# Supplementary material for: Mechanically Enhanced Detoxification of Chemical Warfare Agent Simulants by a Two-Dimensional Piezoresponsive Metal–Organic Framework
Source: MDPI journal article supplement (doi:10.3390/nano14070559), 2024-03-22
Supplement: s1 [file s1]

*Article*

# Mechanically Enhanced Detoxification of Chemical Warfare Agent Simulants by a Two-Dimensional Piezoresponsive Metal–Organic Framework

Yuyang Liu <sup>†</sup>, Shiyin Zhao <sup>†</sup>, Yujiao Li, Jian Huang, Xuheng Yang, Jianfang Wang <sup>\*</sup> and Cheng-an Tao <sup>\*</sup>

College of Science, National University of Defense Technology, Changsha 430083, China; liuyuyang0412@163.com (Y.L.); zhaoshiyin21@nudt.edu.cn (S.Z.); liyujiao15@nudt.edu.cn (Y.L.); huangjian2015@nudt.edu.cn (J.H.); ouyangxuheng@163.com (X.Y.)

<sup>\*</sup> Correspondence: jianfangwang@nudt.edu.cn (J.W.); chengantao@nudt.edu.cn (C.-a.T.)

<sup>†</sup> These authors contributed equally to this work.

This supporting information contained 3 figures (Figure S1–S3).

(a)

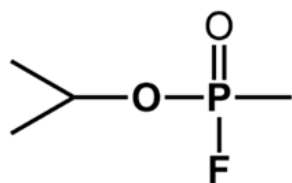

(b)

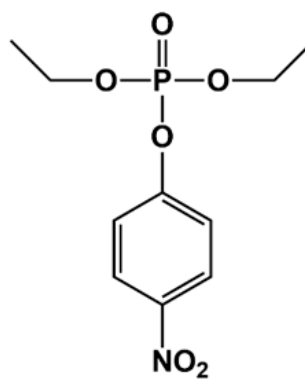

**Figure S1.** The chemical structure of (a) Sarin and (b) simulant DMNP.

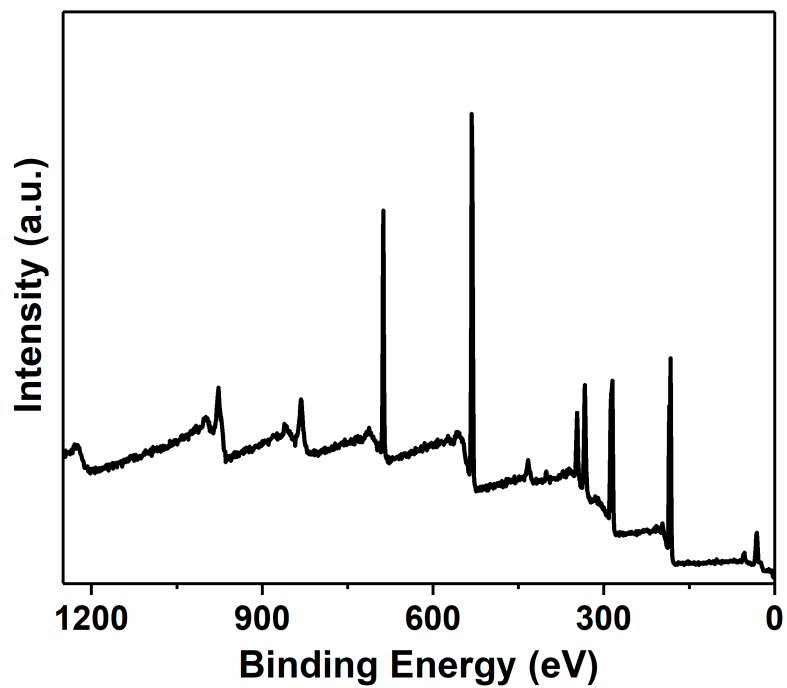

**Figure S2.** The XPS survey spectra of UiO-66-F<sub>4</sub>.

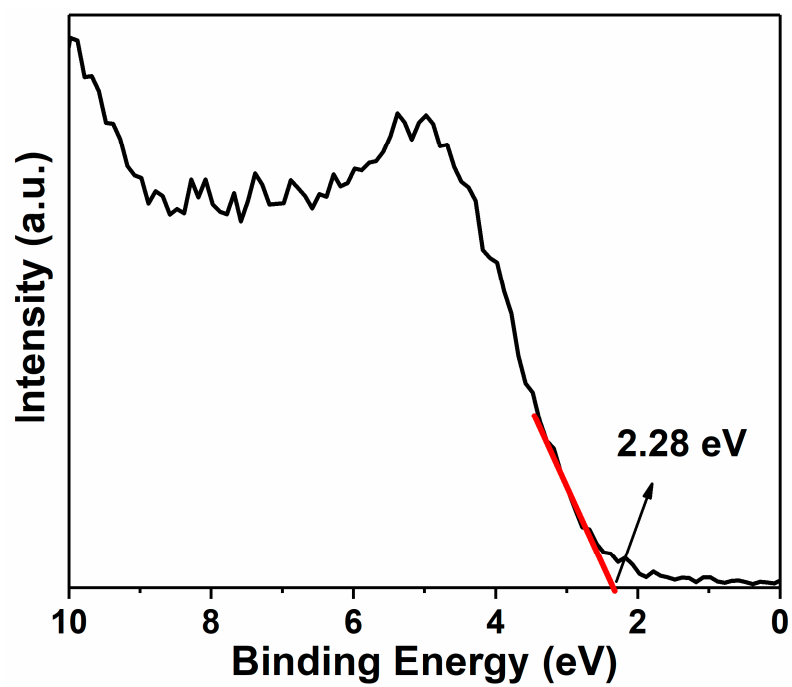

**Figure S3.** The valence XPS spectra of UiO-66-F4.
